# Supplementary material
Source: publisher site journal article supplement (https://www.dovepress.com/article/225678)

The original images for all relevant western blots have been provided (Supplementary file).

Figure 3A

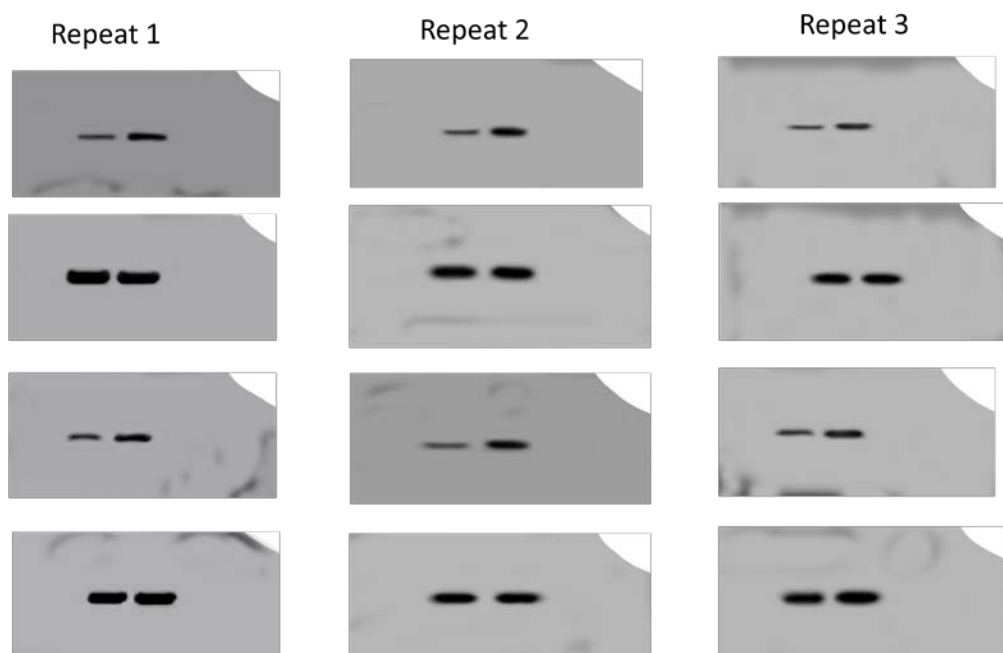

Figure 3E

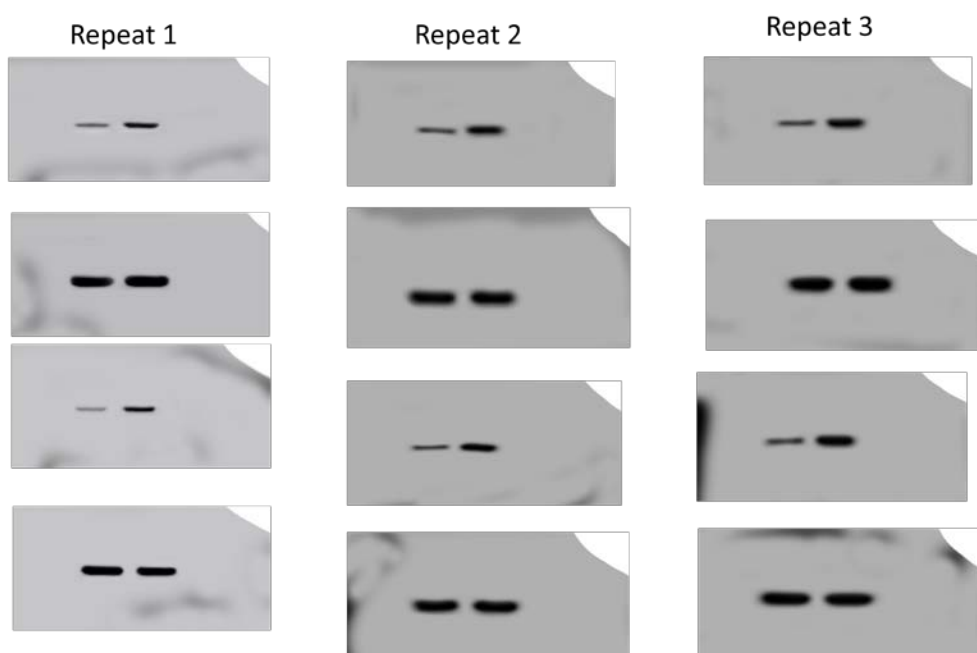

Figure 3I

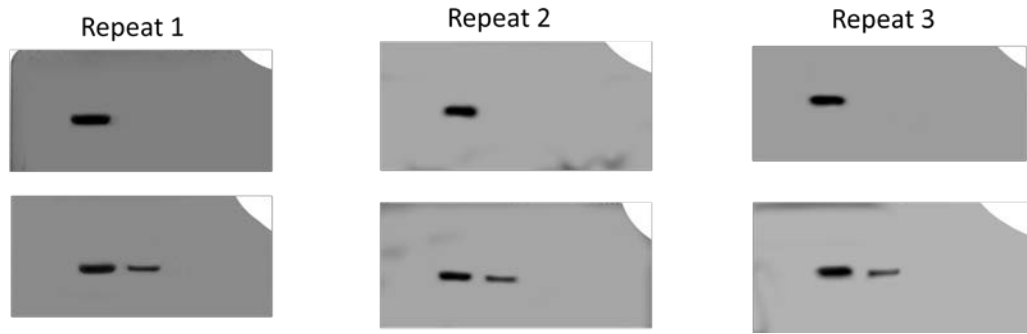

Figure 3J

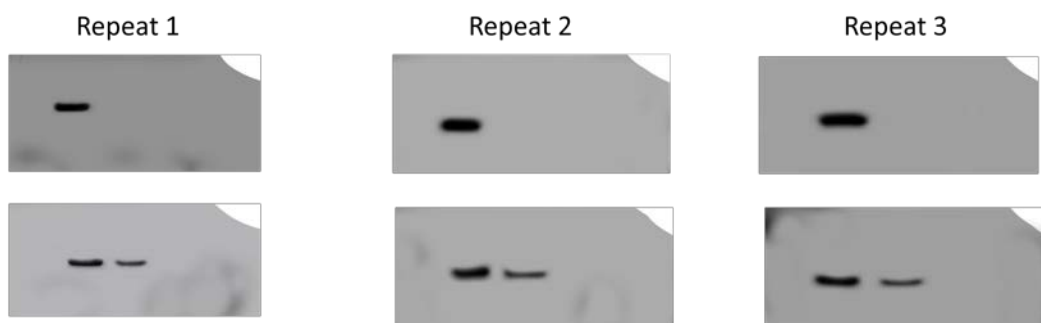

Figure 4B

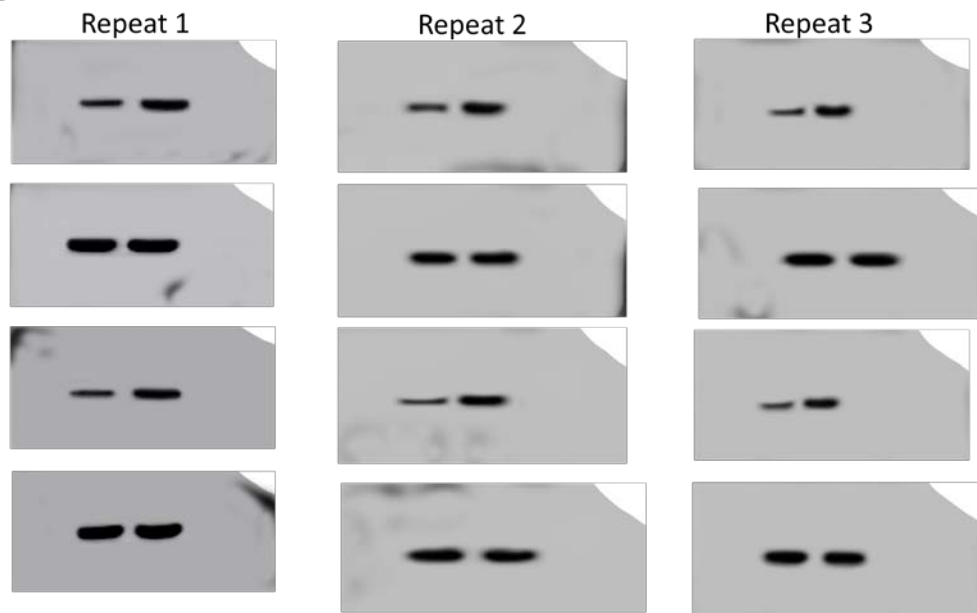

Figure 5A

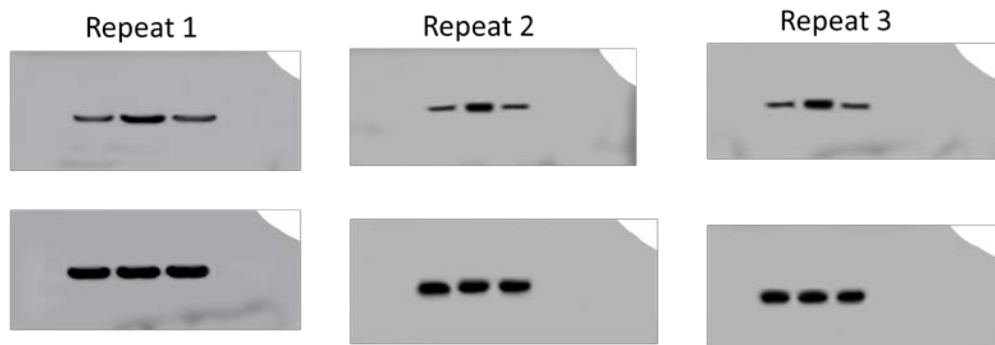

Figure 5B

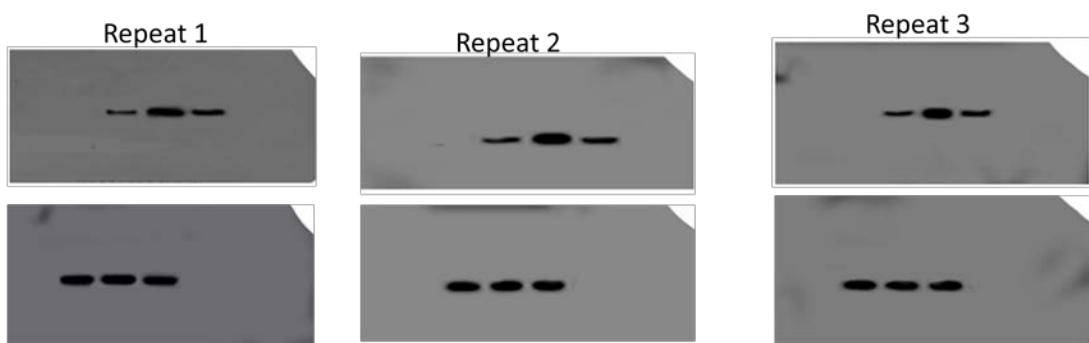

Figure 6E

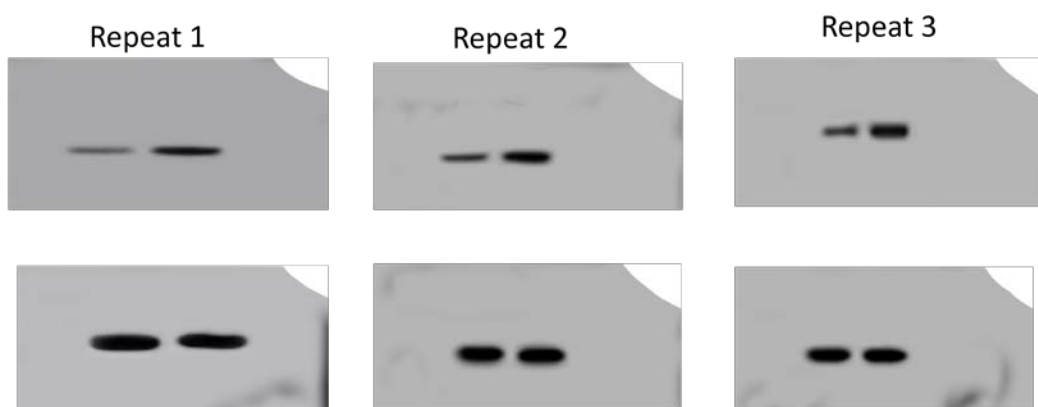

Supplement: Supplementary file 1 [file get_supplementary_file.php]
